# Supplementary material for: Overpressure Exposure From .50-Caliber Rifle Training Is Associated With Increased Amyloid Beta Peptides in Serum
Source: Front Neurol. 2020 Jul 24;11:620. doi: 10.3389/fneur.2020.00620 (PMC7396645; doi:10.3389/fneur.2020.00620)
Supplement: Supplementary Table 4 — Dunn's multiple comparisons for biomarkers across three days (*p ≤ 0.05, RM-ANOVA with Dunn's post-hoc test). [file Table_4.XLSX]

## Sheet: Supplementary Table 4.
Supplementary Table 4.
GFAP					Nf-L					ABeta-40					ABeta-42					UCH-L1					Tau
Number of families	1				Number of families	1				Number of families	1				Number of families	1				Number of families	1				Number of families	1
Number of comparisons per family	15				Number of comparisons per family	15				Number of comparisons per family	15				Number of comparisons per family	15				Number of comparisons per family	15				Number of comparisons per family	15
Alpha	0.05				Alpha	0.05				Alpha	0.05				Alpha	0.05				Alpha	0.05				Alpha	0.05
Dunn's multiple comparisons test	Rank sum diff.	Significant?	Summary	Adjusted P Value	Dunn's multiple comparisons test	Rank sum diff.	Significant?	Summary	Adjusted P Value	Dunn's multiple comparisons test	Rank sum diff.	Significant?	Summary	Adjusted P Value	Dunn's multiple comparisons test	Rank sum diff.	Significant?	Summary	Adjusted P Value	Dunn's multiple comparisons test	Rank sum diff.	Significant?	Summary	Adjusted P Value	Dunn's multiple comparisons test	Rank sum diff.	Significant?	Summary	Adjusted P Value
Day-1 Pre vs. Day-1 Post	47	Yes	****	<0.0001	Day-1 Pre vs. Day-1 Post	-7.5	No	ns	>0.9999	Day-1 Pre vs. Day-1 Post	-16.5	No	ns	>0.9999	Day-1 Pre vs. Day-1 Post	-42	Yes	***	0.0006	Day-1 Pre vs. Day-1 Post	-14.5	No	ns	>0.9999	Day-1 Pre vs. Day-1 Post	-0.5	No	ns	>0.9999
Day-1 Pre vs. Day-2 Pre	17	No	ns	>0.9999	Day-1 Pre vs. Day-2 Pre	5	No	ns	>0.9999	Day-1 Pre vs. Day-2 Pre	19	No	ns	0.9556	Day-1 Pre vs. Day-2 Pre	3	No	ns	>0.9999	Day-1 Pre vs. Day-2 Pre	0	No	ns	>0.9999	Day-1 Pre vs. Day-2 Pre	-8	No	ns	>0.9999
Day-1 Pre vs. Day-2 Post	12	No	ns	>0.9999	Day-1 Pre vs. Day-2 Post	9.5	No	ns	>0.9999	Day-1 Pre vs. Day-2 Post	-24.5	No	ns	0.2521	Day-1 Pre vs. Day-2 Post	-42	Yes	***	0.0006	Day-1 Pre vs. Day-2 Post	2	No	ns	>0.9999	Day-1 Pre vs. Day-2 Post	-5.5	No	ns	>0.9999
Day-1 Pre vs. Day-3 Pre	21	No	ns	0.6064	Day-1 Pre vs. Day-3 Pre	14	No	ns	>0.9999	Day-1 Pre vs. Day-3 Pre	3	No	ns	>0.9999	Day-1 Pre vs. Day-3 Pre	-14	No	ns	>0.9999	Day-1 Pre vs. Day-3 Pre	4	No	ns	>0.9999	Day-1 Pre vs. Day-3 Pre	-5.5	No	ns	>0.9999
Day-1 Pre vs. Day-3 Post	44	Yes	***	0.0003	Day-1 Pre vs. Day-3 Post	36	Yes	**	0.0066	Day-1 Pre vs. Day-3 Post	-26	No	ns	0.1675	Day-1 Pre vs. Day-3 Post	-46	Yes	***	0.0001	Day-1 Pre vs. Day-3 Post	2.5	No	ns	>0.9999	Day-1 Pre vs. Day-3 Post	7.5	No	ns	>0.9999
Day-1 Post vs. Day-2 Pre	-30	No	ns	0.0512	Day-1 Post vs. Day-2 Pre	12.5	No	ns	>0.9999	Day-1 Post vs. Day-2 Pre	35.5	Yes	**	0.008	Day-1 Post vs. Day-2 Pre	45	Yes	***	0.0002	Day-1 Post vs. Day-2 Pre	14.5	No	ns	>0.9999	Day-1 Post vs. Day-2 Pre	-7.5	No	ns	>0.9999
Day-1 Post vs. Day-2 Post	-35	Yes	**	0.0095	Day-1 Post vs. Day-2 Post	17	No	ns	>0.9999	Day-1 Post vs. Day-2 Post	-8	No	ns	>0.9999	Day-1 Post vs. Day-2 Post	0	No	ns	>0.9999	Day-1 Post vs. Day-2 Post	16.5	No	ns	>0.9999	Day-1 Post vs. Day-2 Post	-5	No	ns	>0.9999
Day-1 Post vs. Day-3 Pre	-26	No	ns	0.1675	Day-1 Post vs. Day-3 Pre	21.5	No	ns	0.5383	Day-1 Post vs. Day-3 Pre	19.5	No	ns	0.8556	Day-1 Post vs. Day-3 Pre	28	No	ns	0.0943	Day-1 Post vs. Day-3 Pre	18.5	No	ns	0.9248	Day-1 Post vs. Day-3 Pre	-5	No	ns	>0.9999
Day-1 Post vs. Day-3 Post	-3	No	ns	>0.9999	Day-1 Post vs. Day-3 Post	43.5	Yes	***	0.0003	Day-1 Post vs. Day-3 Post	-9.5	No	ns	>0.9999	Day-1 Post vs. Day-3 Post	-4	No	ns	>0.9999	Day-1 Post vs. Day-3 Post	17	No	ns	>0.9999	Day-1 Post vs. Day-3 Post	8	No	ns	>0.9999
Day-2 Pre vs. Day-2 Post	-5	No	ns	>0.9999	Day-2 Pre vs. Day-2 Post	4.5	No	ns	>0.9999	Day-2 Pre vs. Day-2 Post	-43.5	Yes	***	0.0003	Day-2 Pre vs. Day-2 Post	-45	Yes	***	0.0002	Day-2 Pre vs. Day-2 Post	2	No	ns	>0.9999	Day-2 Pre vs. Day-2 Post	2.5	No	ns	>0.9999
Day-2 Pre vs. Day-3 Pre	4	No	ns	>0.9999	Day-2 Pre vs. Day-3 Pre	9	No	ns	>0.9999	Day-2 Pre vs. Day-3 Pre	-16	No	ns	>0.9999	Day-2 Pre vs. Day-3 Pre	-17	No	ns	>0.9999	Day-2 Pre vs. Day-3 Pre	4	No	ns	>0.9999	Day-2 Pre vs. Day-3 Pre	2.5	No	ns	>0.9999
Day-2 Pre vs. Day-3 Post	27	No	ns	0.1262	Day-2 Pre vs. Day-3 Post	31	Yes	*	0.0373	Day-2 Pre vs. Day-3 Post	-45	Yes	***	0.0002	Day-2 Pre vs. Day-3 Post	-49	Yes	****	<0.0001	Day-2 Pre vs. Day-3 Post	2.5	No	ns	>0.9999	Day-2 Pre vs. Day-3 Post	15.5	No	ns	>0.9999
Day-2 Post vs. Day-3 Pre	9	No	ns	>0.9999	Day-2 Post vs. Day-3 Pre	4.5	No	ns	>0.9999	Day-2 Post vs. Day-3 Pre	27.5	No	ns	0.1092	Day-2 Post vs. Day-3 Pre	28	No	ns	0.0943	Day-2 Post vs. Day-3 Pre	2	No	ns	>0.9999	Day-2 Post vs. Day-3 Pre	0	No	ns	>0.9999
Day-2 Post vs. Day-3 Post	32	Yes	*	0.0269	Day-2 Post vs. Day-3 Post	26.5	No	ns	0.1456	Day-2 Post vs. Day-3 Post	-1.5	No	ns	>0.9999	Day-2 Post vs. Day-3 Post	-4	No	ns	>0.9999	Day-2 Post vs. Day-3 Post	0.5	No	ns	>0.9999	Day-2 Post vs. Day-3 Post	13	No	ns	>0.9999
Day-3 Pre vs. Day-3 Post	28	Yes	*	0.0329	Day-3 Pre vs. Day-3 Post	32	Yes	*	0.0429	Day-3 Pre vs. Day-3 Post	-29	No	ns	0.0698	Day-3 Pre vs. Day-3 Post	-32	Yes	*	0.0269	Day-3 Pre vs. Day-3 Post	-1.5	No	ns	>0.9999	Day-3 Pre vs. Day-3 Post	13	No	ns	>0.9999
Test details	Rank sum 1	Rank sum 2	Rank sum d	n1	Test details	Rank sum 1	Rank sum 2	Rank sum diff.	n1	Test details	Rank sum 1	Rank sum 2	Rank sum diff.	n1	Test details	Rank sum 1	Rank sum 2	Rank sum d	n1	Test details	Rank sum 1	Rank sum 2	Rank sum diff.	n1	Test details	Rank sum 1	Rank sum 2	Rank sum d	n1
Day-1 Pre vs. Day-1 Post	76	29	47	15	Day-1 Pre vs. Day-1 Post	62	69.5	-7.5	15	Day-1 Pre vs. Day-1 Post	45	61.5	-16.5	15	Day-1 Pre vs. Day-1 Post	29	71	-42	15	Day-1 Pre vs. Day-1 Post	48	62.5	-14.5	14	Day-1 Pre vs. Day-1 Post	50.5	51	-0.5	15
Day-1 Pre vs. Day-2 Pre	76	59	17	15	Day-1 Pre vs. Day-2 Pre	62	57	5	15	Day-1 Pre vs. Day-2 Pre	45	26	19	15	Day-1 Pre vs. Day-2 Pre	29	26	3	15	Day-1 Pre vs. Day-2 Pre	48	48	0	14	Day-1 Pre vs. Day-2 Pre	50.5	58.5	-8	15
Day-1 Pre vs. Day-2 Post	76	64	12	15	Day-1 Pre vs. Day-2 Post	62	52.5	9.5	15	Day-1 Pre vs. Day-2 Post	45	69.5	-24.5	15	Day-1 Pre vs. Day-2 Post	29	71	-42	15	Day-1 Pre vs. Day-2 Post	48	46	2	14	Day-1 Pre vs. Day-2 Post	50.5	56	-5.5	15
Day-1 Pre vs. Day-3 Pre	76	55	21	15	Day-1 Pre vs. Day-3 Pre	62	48	14	15	Day-1 Pre vs. Day-3 Pre	45	42	3	15	Day-1 Pre vs. Day-3 Pre	29	43	-14	15	Day-1 Pre vs. Day-3 Pre	48	44	4	14	Day-1 Pre vs. Day-3 Pre	50.5	56	-5.5	15
Day-1 Pre vs. Day-3 Post	76	32	44	15	Day-1 Pre vs. Day-3 Post	62	26	36	15	Day-1 Pre vs. Day-3 Post	45	71	-26	15	Day-1 Pre vs. Day-3 Post	29	75	-46	15	Day-1 Pre vs. Day-3 Post	48	45.5	2.5	14	Day-1 Pre vs. Day-3 Post	50.5	43	7.5	15
Day-1 Post vs. Day-2 Pre	29	59	-30	15	Day-1 Post vs. Day-2 Pre	69.5	57	12.5	15	Day-1 Post vs. Day-2 Pre	61.5	26	35.5	15	Day-1 Post vs. Day-2 Pre	71	26	45	15	Day-1 Post vs. Day-2 Pre	62.5	48	14.5	14	Day-1 Post vs. Day-2 Pre	51	58.5	-7.5	15
Day-1 Post vs. Day-2 Post	29	64	-35	15	Day-1 Post vs. Day-2 Post	69.5	52.5	17	15	Day-1 Post vs. Day-2 Post	61.5	69.5	-8	15	Day-1 Post vs. Day-2 Post	71	71	0	15	Day-1 Post vs. Day-2 Post	62.5	46	16.5	14	Day-1 Post vs. Day-2 Post	51	56	-5	15
Day-1 Post vs. Day-3 Pre	29	55	-26	15	Day-1 Post vs. Day-3 Pre	69.5	48	21.5	15	Day-1 Post vs. Day-3 Pre	61.5	42	19.5	15	Day-1 Post vs. Day-3 Pre	71	43	28	15	Day-1 Post vs. Day-3 Pre	62.5	44	18.5	14	Day-1 Post vs. Day-3 Pre	51	56	-5	15
Day-1 Post vs. Day-3 Post	29	32	-3	15	Day-1 Post vs. Day-3 Post	69.5	26	43.5	15	Day-1 Post vs. Day-3 Post	61.5	71	-9.5	15	Day-1 Post vs. Day-3 Post	71	75	-4	15	Day-1 Post vs. Day-3 Post	62.5	45.5	17	14	Day-1 Post vs. Day-3 Post	51	43	8	15
Day-2 Pre vs. Day-2 Post	59	64	-5	15	Day-2 Pre vs. Day-2 Post	57	52.5	4.5	15	Day-2 Pre vs. Day-2 Post	26	69.5	-43.5	15	Day-2 Pre vs. Day-2 Post	26	71	-45	15	Day-2 Pre vs. Day-2 Post	48	46	2	14	Day-2 Pre vs. Day-2 Post	58.5	56	2.5	15
Day-2 Pre vs. Day-3 Pre	59	55	4	15	Day-2 Pre vs. Day-3 Pre	57	48	9	15	Day-2 Pre vs. Day-3 Pre	26	42	-16	15	Day-2 Pre vs. Day-3 Pre	26	43	-17	15	Day-2 Pre vs. Day-3 Pre	48	44	4	14	Day-2 Pre vs. Day-3 Pre	58.5	56	2.5	15
Day-2 Pre vs. Day-3 Post	59	32	27	15	Day-2 Pre vs. Day-3 Post	57	26	31	15	Day-2 Pre vs. Day-3 Post	26	71	-45	15	Day-2 Pre vs. Day-3 Post	26	75	-49	15	Day-2 Pre vs. Day-3 Post	48	45.5	2.5	14	Day-2 Pre vs. Day-3 Post	58.5	43	15.5	15
Day-2 Post vs. Day-3 Pre	64	55	9	15	Day-2 Post vs. Day-3 Pre	52.5	48	4.5	15	Day-2 Post vs. Day-3 Pre	69.5	42	27.5	15	Day-2 Post vs. Day-3 Pre	71	43	28	15	Day-2 Post vs. Day-3 Pre	46	44	2	14	Day-2 Post vs. Day-3 Pre	56	56	0	15
Day-2 Post vs. Day-3 Post	64	32	32	15	Day-2 Post vs. Day-3 Post	52.5	26	26.5	15	Day-2 Post vs. Day-3 Post	69.5	71	-1.5	15	Day-2 Post vs. Day-3 Post	71	75	-4	15	Day-2 Post vs. Day-3 Post	46	45.5	0.5	14	Day-2 Post vs. Day-3 Post	56	43	13	15
Day-3 Pre vs. Day-3 Post	55	32	28	15	Day-3 Pre vs. Day-3 Post	48	26	32	15	Day-3 Pre vs. Day-3 Post	42	71	-29	15	Day-3 Pre vs. Day-3 Post	43	75	-32	15	Day-3 Pre vs. Day-3 Post	44	45.5	-1.5	14	Day-3 Pre vs. Day-3 Post	56	43	13	15
